# Supplementary material
Source: Springer Nature journal article supplement (https://www.springermedizin.de/resource/supplementary/12885_2012_3425_MOESM3_ESM.pdf/9462868)

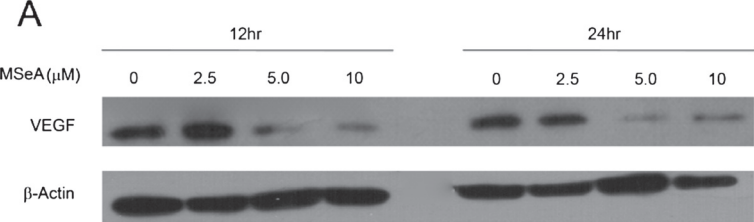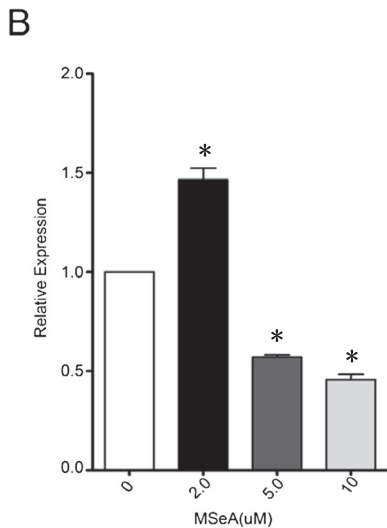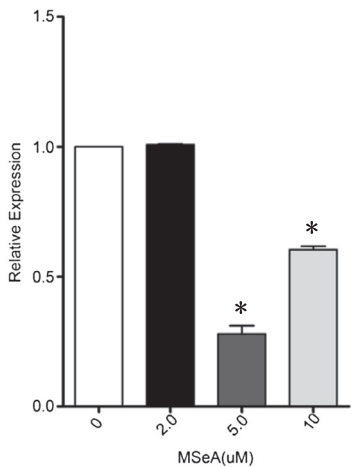

Supplement: MOESM3 [file 9462868]
